# Supplementary material for: N-Glycan profile of the cell membrane as a probe for lipopolysaccharide-induced microglial neuroinflammation uncovers the effects of common fatty acid supplementation
Source: Royal Society of Chemistry journal article supplement (doi:10.1039/d4fo01598c), 2024-01-01
Supplement: d4fo01598c1.pdf [file d4fo01598c1.pdf]

## Supplementary data

### **N-Glycan Profile of Cell Membrane as Probe for Lipopolysaccharide-induced Microglial Neuroinflammation Uncovers the Effects of Common Fatty Acid Supplementation**

Sheryl Joyce B. Grijaldo-Alvarez<sup>a,b</sup>, Michael Russelle S. Alvarez<sup>a</sup>, Ryan Lee Schindler<sup>a</sup>, Armin Oloumi<sup>a</sup>, Noah Hernandez<sup>a</sup>, Tristan Seales<sup>a</sup>, Jorge Gil C. Angeles<sup>c</sup>, Ruel C. Nacario<sup>b</sup>, Gladys C. Completo<sup>b</sup>, Angela M. Zivkovic<sup>d</sup>, J. Bruce German<sup>e</sup>, Carlito B. Lebrilla<sup>a\*</sup>

<sup>a</sup> Department of Chemistry, University of California, Davis, USA 95616

<sup>b</sup> Institute of Chemistry, University of the Philippines Los Baños, Philippines 4031

<sup>c</sup> Philippine Genome Center – Program for Agriculture, Livestock, Fisheries and Forestry, University of the Philippines Los Baños, Philippines 4031

<sup>d</sup> Department of Nutrition, University of California, Davis, USA 95616

<sup>e</sup> Department of Food Science and Technology, University of California, Davis, USA 95616

Correspondence:

\*Email: [cblebrilla@ucdavis.edu](mailto:cblebrilla@ucdavis.edu)

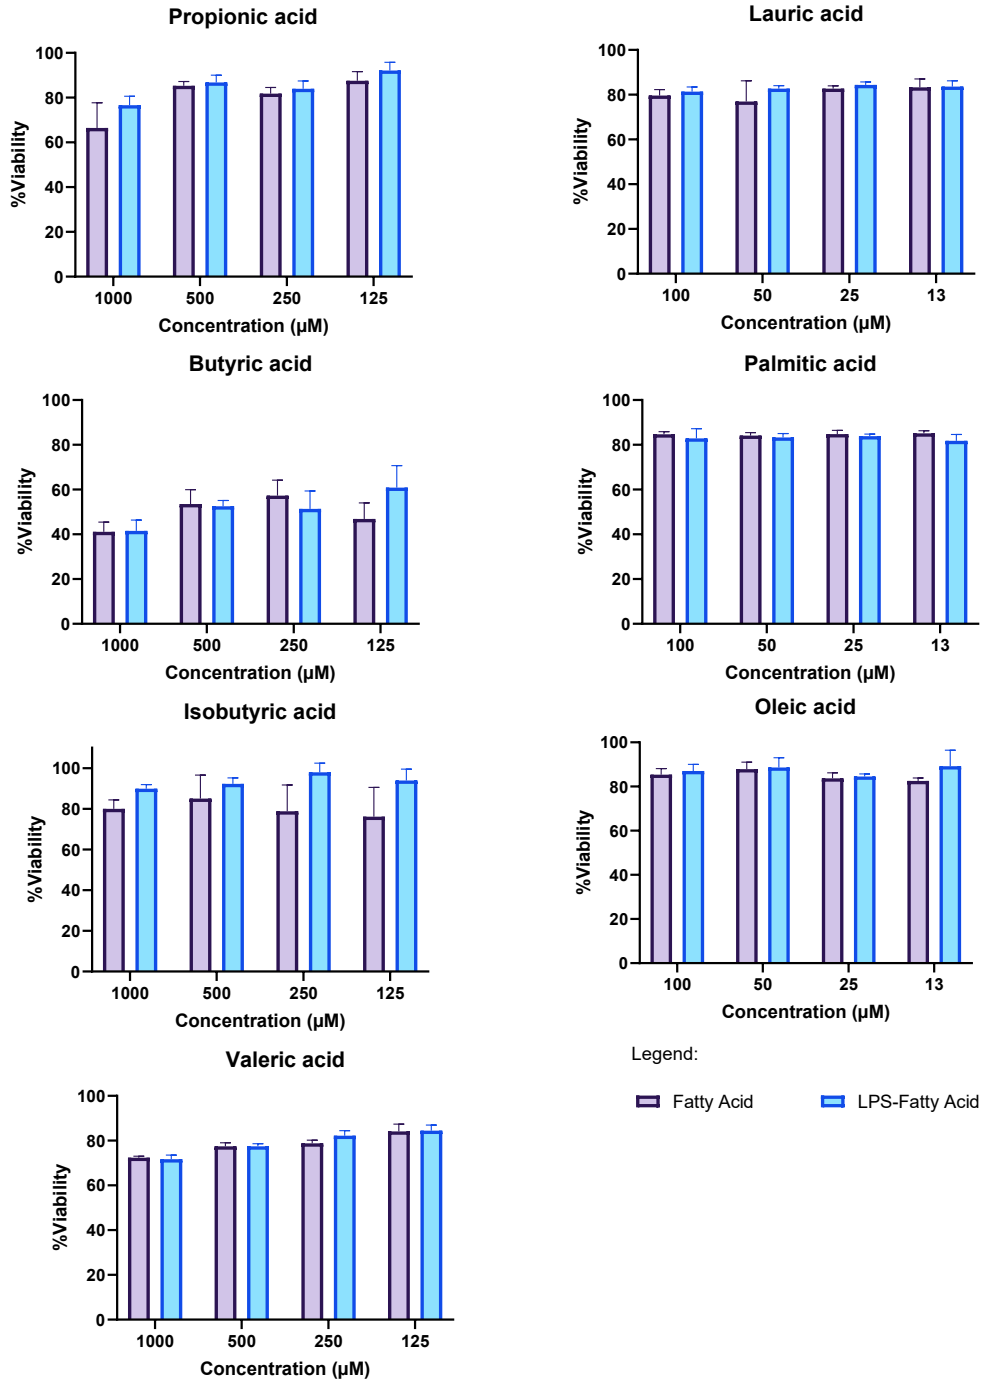

**Supplementary Figure 1. Microglial cell viability against fatty acid and LPS-fatty acid treatments.** Bar graph illustrating cell viability assay using the MTS assay of the HMC3 microglial cells after 24h of incubation with select fatty acids (violet bar) or with LPS-fatty acid (blue bar).

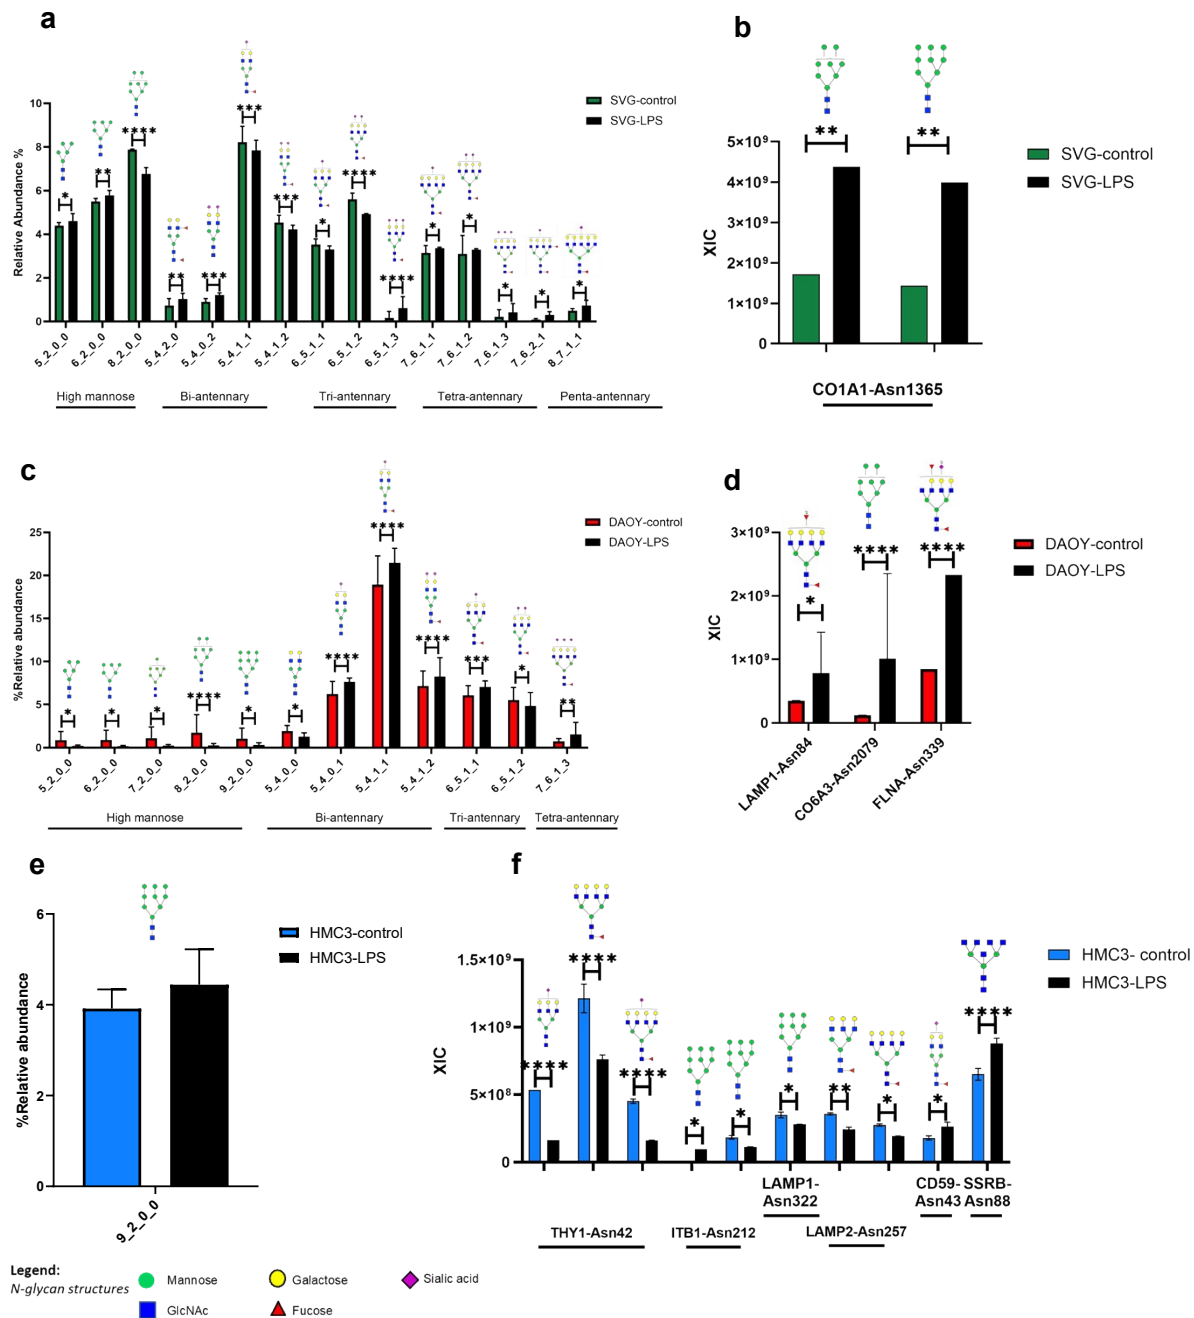

**Supplementary Figure 2. Significantly different N-glycans and site-specific N-glycopeptide of *in vitro* neuroinflammation cell models (4a) N-glycans and (4b) N-glycopeptides in astroglia, SVG p12 cells; (4c) N-glycans and (4d) N-glycopeptides in medulloblastoma, DAOY cells; (4e) N-glycans and (4f) N-glycopeptides in microglia, HMC3 cells.**

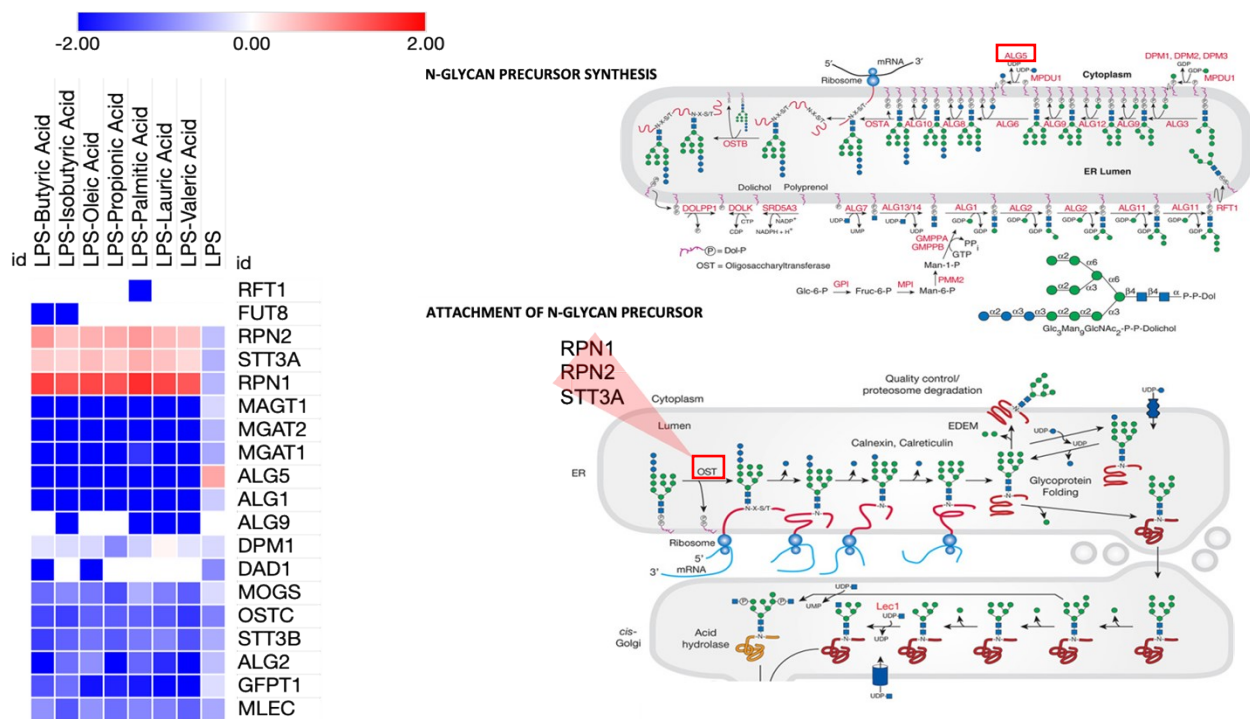

**Supplementary Figure 3. Proteomics results of LPS- and fatty acids-treated microglia showing under- and overexpressed proteins related to N-glycosylation. Diagrams used showcasing N-glycan precursor synthesis and attachment of N-glycan precursor were lifted from *Essentials of Glycobiology* (Varki et al., 2022). ALG5= Asparagine-Linked Glycosylation 5 Homolog; OST=Oligosaccharyltransferase, RPN1/2= Dolichyl-diphosphooligosaccharide--protein glycosyltransferase subunit 1/2; STT3A=Dolichyl-diphosphooligosaccharide--protein glycosyltransferase subunit STT3A**

**a** 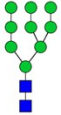 Microglia (HMC3)  
MS/MS of 9200  
Precursor ion m/z 942.33(z=2+)

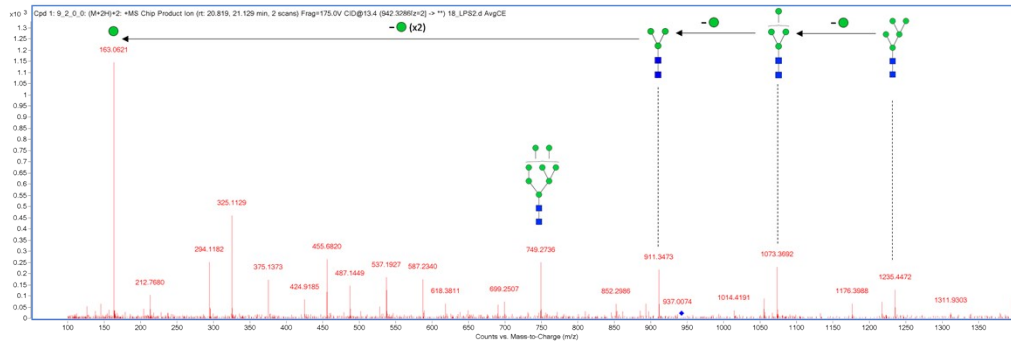

**b** 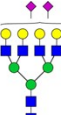 Microglia (HMC3)  
MS/MS of 7612, terminal fucose  
Precursor ion m/z 1034.04 (z=3+)

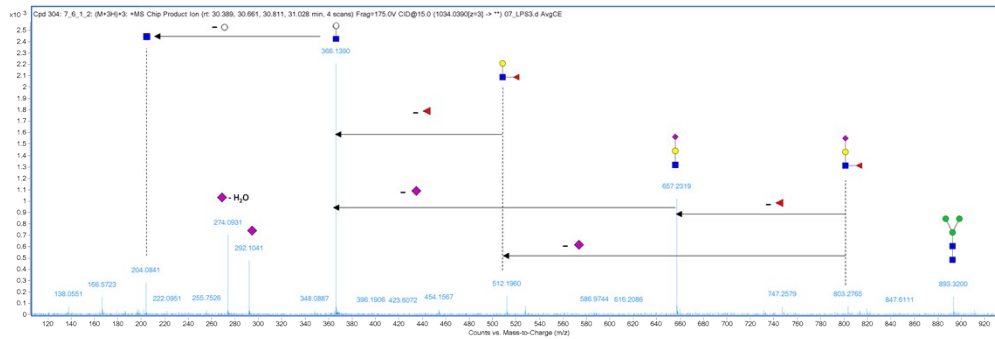

**c** 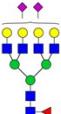 Microglia (HMC3)  
MS/MS of 7612, core fucose  
Precursor ion m/z 1034.04 (z=3+)

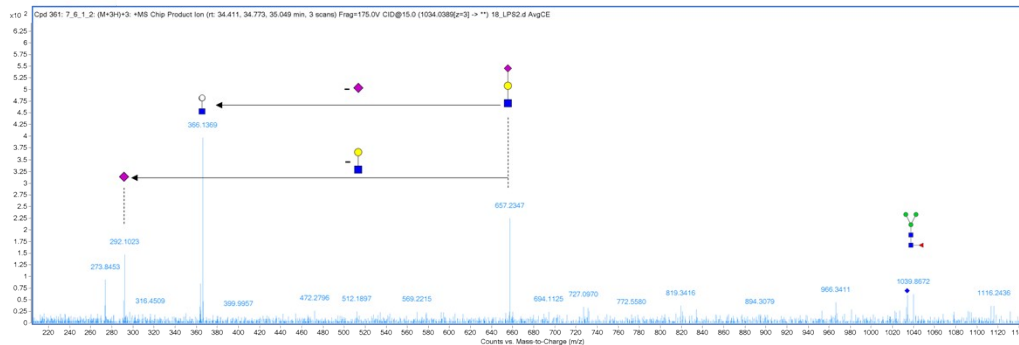

Supplementa

ry Figure 4. Tandem MS/MS spectra of select differentially expressed N-glycans affected by LPS in microglial cells.

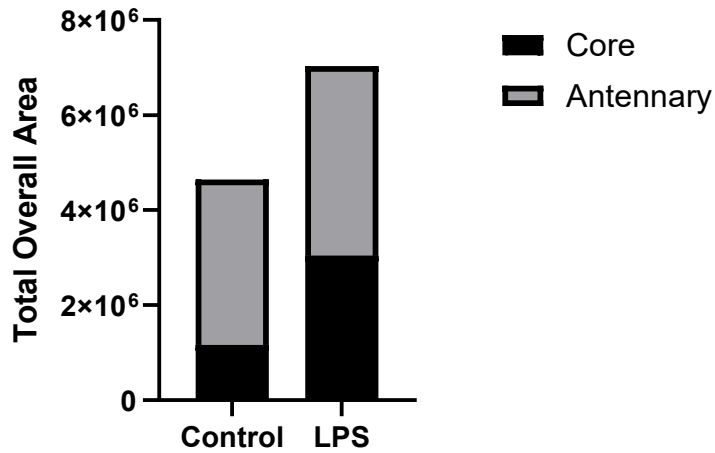

**Supplementary Figure 5. Observed Fucose Position in Sialofucosylated N-glycan, Hex7HexNAc6Fuc1Sia1.** Determination of core vs antennary was done based on relative retention time (where Hex5HexNAc4Fuc1Sia1 with the highest peak area was used as the retention time marker).

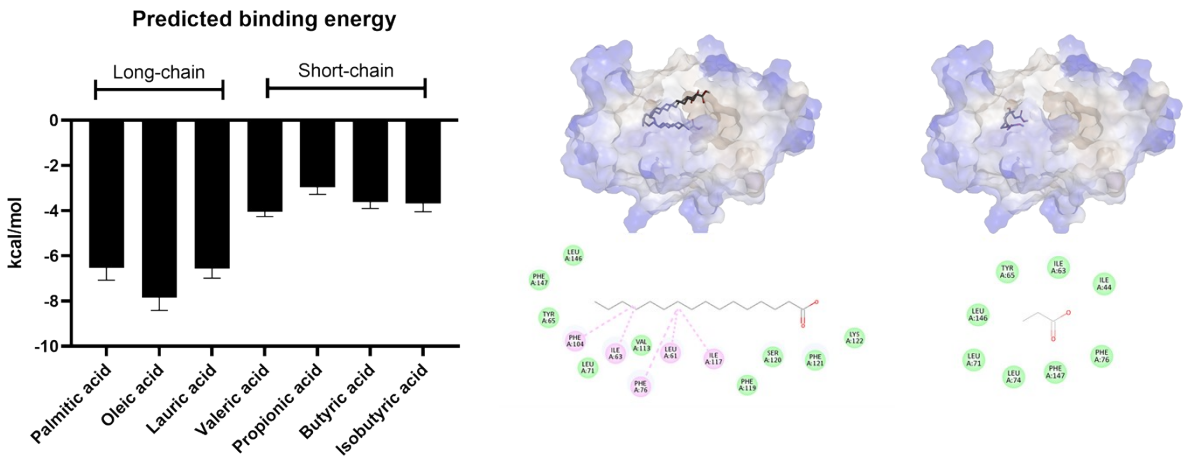

**Supplementary Figure 6. *In silico* calculations and models of binding between MD-2 protein and dietary (palmitic, oleic, lauric) and gut microbiota-derived (valeric, propionic, butyric, isobutyric) fatty acids. MD-2= myeloid differentiation factor 2**

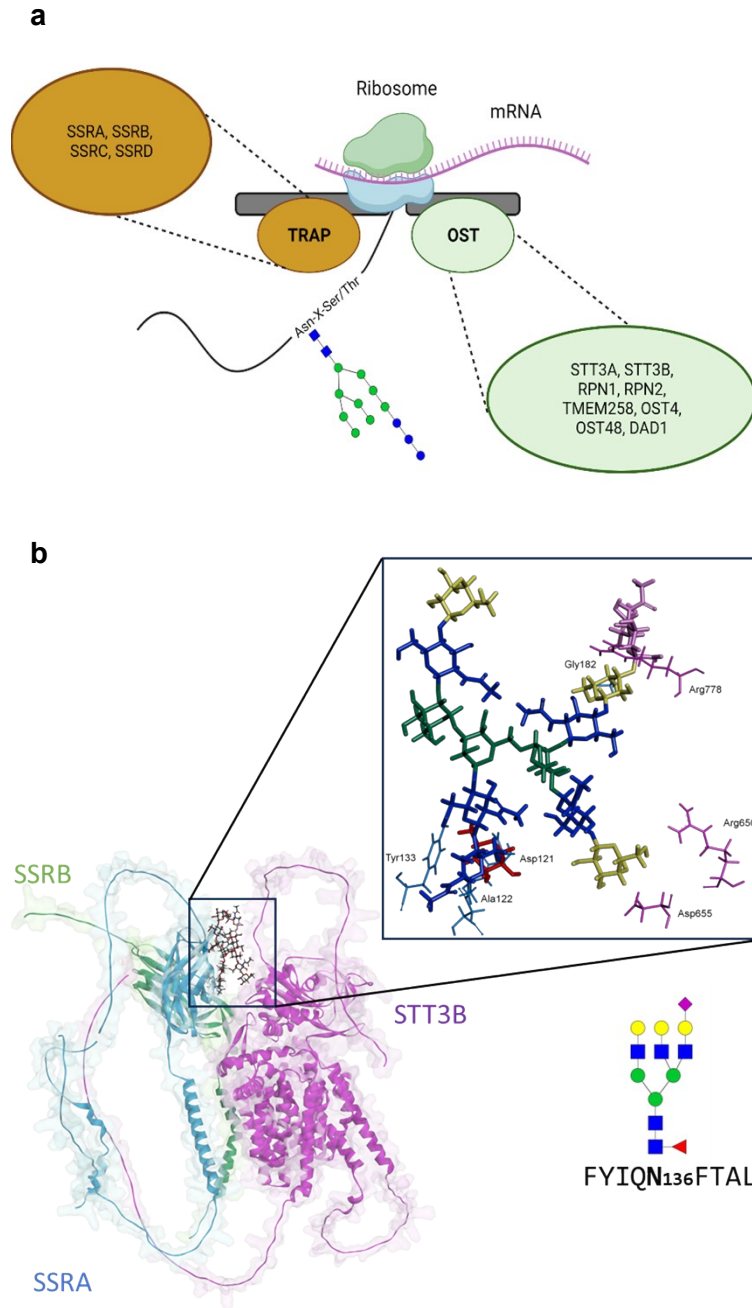

**Supplementary Figure 7. Interaction between TRAP complex and OST complex. (7a)**

TRAP and OST are in proximity which suggests possible interaction between the 2 protein complexes. (7b) *In silico* approach shows sialofucosylation is critical in the binding between SSRA and STT3B, catalytic subunit of the oligosaccharyl transferase (OST) complex that catalyzes the first step in protein N-glycosylation.
